# Supplementary material for: Crystal Structures of the Catalytic Domain of Human Soluble Guanylate Cyclase
Source: PubMed Central journal article supplement (PMC3591389; doi:10.1371/journal.pone.0057644), 2013-03-07
Supplement: pone.0057644.s001.pdf [file pone.0057644.s001.pdf]

|    |     |      | 480       | 490   | 500  | 510   | 520           |          |         |        |       |        |      |      |
|----|-----|------|-----------|-------|------|-------|---------------|----------|---------|--------|-------|--------|------|------|
| Hs | GCA | 477  | FSNVTMLFS | IVGF  | TAI  | CSQCS | ----PLQVITMLN | ALYTRFDQ | QC      | GEL--- | DVYK  | VE     | TIG  |      |
| Dm | GCA | 462  | YPDV      | TILFS | IVGF | TSICS | RAT----       | PFMVISM  | LEGLYK  | DFDE   | FC    | DF     | ---  |      |
| Cf | AC1 | 387  | HDNV      | SILFA | IEGF | TSIAS | QCT----       | AQELVMT  | LNELFAR | FDKLA  | AE    | ---    | HCLR | IK   |
| Hs | GCB | 417  | YDNVT     | ILFSG | IVGF | FNAFC | SKHAS         | GEGAMK   | IVNLL   | NDLY   | TRFD  | TLT    | DSR  | KN   |
| Dm | GCB | 415  | YDSVT     | LMFSG | IVGF | GQYCA | ANTDPD        | GAMKIV   | KMLNEL  | YTVF   | DAL   | TDS    | KRN  | LN   |
| Rn | AC2 | 882  | YDCVC     | VMFAS | IPDF | KFEFY | TESD          | VNKEGL   | ECLRL   | NEI    | IADF  | DDL    | SKP  | KF   |
| Cr | GC  | 473  | HPEAT     | VLF   | IVGF | TEIAS | RSS----       | PLEVCS   | LLELY   | QRFDA  | AAIE  | EYP--  | QLYK | VE   |
| Dm | GC  | 417  | FDSVS     | ILFS  | IVTF | TEICS | RIT----       | PMEVVS   | MLNAM   | YSIF   | DKL   | TERN   | ---  | SVYK |
| Sp | AC  | 1008 | PRLIT     | ILFS  | IVGF | TRMS  | NALQ----      | SQGVAE   | LLNE    | YLGE   | MTRAV | FEN--- | QGT  | V    |

1

2

|    |     |      | 530  | 540     | 550   | 560    | 570    |
|----|-----|------|------|---------|-------|--------|--------|
| Hs | GCA | 530  | DAYC | VAGGLH  | ----- | KESD   | THAVQI |
| Dm | GCA | 515  | DAYC | VASGLH  | ----- | RASI   | YDAH   |
| Cf | AC1 | 440  | DCY  | YCVSGLP | ----- | EARA   | DHAC   |
| Hs | GCB | 477  | DKY  | MTVSGL  | ----- | PEPC   | IHHAR  |
| Dm | GCB | 587  | DKY  | MAVSGL  | ----- | PDHC   | EDHAK  |
| Rn | AC2 | 942  | STY  | MAATGL  | SAIP  | SQEH   | AQEP   |
| Cr | GC  | 527  | DAY  | MVVCNVT | ----- | VPCD   | DHAD   |
| Dm | GC  | 470  | DAY  | MV      | VAGAP | -----  | DKDAN  |
| Sp | AC  | 1061 | DAI  | MALYGA  | PEEM  | SP---- | SEQV   |

3

|    |     |      | 580  | 590   | 600   | 610    | 620  | 630 |
|----|-----|------|------|-------|-------|--------|------|-----|
| Hs | GCA | 573  | MRIG | LHSG  | SVFAG | VVGVK  | MPRY |     |
| Dm | GCA | 558  | MRIG | LHTGT | VLAV  | VVGRK  | MPRY |     |
| Cf | AC1 | 483  | MRV  | GIHSG | RVHCG | VLG-LR | KWQF |     |
| Hs | GCB | 515  | ITIG | IHTGE | VVTG  | VIG-QR | MPRY |     |
| Dm | GCB | 629  | ITIG | IHSGE | VVTG  | VIG-NR | VPRY |     |
| Rn | AC2 | 996  | LRV  | GINHG | PVIAG | VIG-AQ | KPQY |     |
| Cr | GC  | 570  | IRV  | GMHSG | PVAV  | VVGRK  | MPRF |     |
| Dm | GC  | 514  | IRV  | GVHSG | AVVAG | IVGLK  | MPRY |     |
| Sp | AC  | 1116 | FR   | CGIH  | QGM   | AVVGL  | FGSQ |     |

4

5

6

7

|    |     |      | 630 | 640   | 650   | 660  | 670   | 680 |
|----|-----|------|-----|-------|-------|------|-------|-----|
| Hs | GCA | 632  | F-- | VFT   | PRS   | REEL | PPNF  |     |
| Dm | GCA | 617  | F-- | EFEL  | QPRD  | --PS | FLPKE |     |
| Cf | AC1 | 541  | --- | EVE   | PGCG  | GERN | AYLKE |     |
| Hs | GCB | 578  | SDP | QFHLE | HGR   | PVSM | GKKE  |     |
| Dm | GCB | 688  | QDD | SFHLE | YRGP  | VIMG | KPTP  |     |
| Rn | AC2 | 1054 | --- | YTCT  | CRGI  | INVK | GKGD  |     |
| Cr | GC  | 628  | --- | RFE   | IRER  | GNIT | VKG   |     |
| Dm | GC  | 571  | --- | YKI   | IERGE | IDV  | GKGT  |     |
| Sp | AC  | 1175 | --- | IKR   | EFL   | ELK  | GID   |     |

8
